# Supplementary material for: How Does Cloud-Radiative Heating over the North Atlantic Change with Grid Spacing, Convective Parameterization, and Microphysics Scheme?
Source: Copernicus journal article supplement (doi:10.5194/egusphere-2023-109), 2023-02-14
Supplement: Supplementary file [file egusphere-2023-109-AC3-supplement.pdf]

## Editor Responses

Dear authors,

In my role as Executive editor of GMD, I would like to bring to your attention our Editorial version 1.2: <https://www.geosci-model-dev.net/12/2215/2019/>

This highlights some requirements of papers published in GMD, which is also available on the GMD website in the 'Manuscript Types' section:

[http://www.geoscientific-model-development.net/submission/manuscript\\_types.html](http://www.geoscientific-model-development.net/submission/manuscript_types.html)

Thank you for bringing these guidelines to our attention.

In particular, please note that for your paper, the following requirements have not been fully met in the Discussions paper:

- "The main paper must give the model name and version number (or other unique identifier) in the title."
- "If the model development relates to a single model, then the model name and the version number must be included in the title of the paper. If the main intention of an article is to make a general (i.e. model independent) statement about the usefulness of a new development, but the usefulness is shown with the help of one specific model, the model name and version number must be state in the title. The title could have a form such as, "Title outlining amazing generic advance: a case study with Model XXX (version Y)"."
- "Code must be published on a persistent public archive with a unique identifier for the exact model version described in the paper or uploaded to the supplement, unless this is impossible for reasons beyond the control of authors. All papers must include a section, at the end of the paper, entitled "Code availability". Here, either instructions for obtaining the code, or the reasons why the code is not available should be clearly stated. It is preferred for the code to be uploaded as a supplement or to be made available at a data repository with an associated DOI (digital object identifier) for the exact model version described in the paper. Alternatively, for established models, there may be an existing means of accessing the code through a particular system. In this case, there must exist a means of permanently accessing the precise model version described in the paper. In some cases, authors may prefer to put models on their own website, or to act as a point of contact for obtaining the code. Given the impermanence of websites and email addresses, this is not encouraged, and authors should consider improving the availability with a more permanent arrangement. Making code available through personal websites or via email contact to the authors is not sufficient. After the paper is accepted the model archive should be updated to include a link to the GMD paper."

As your study was performed with ICON please add to the title this additional information (including a version number of ICON); e.g. "How Does Cloud-Radiative Heating over the North Atlantic Change with Grid Spacing, Convective Parameterization, and Microphysics Scheme? A case study with ICON vX.Y"

Additionally, state explicitly in your code availability section that ICON is license bound and thus can only be accessed via DWD (or MPI-M?)

We have added the ICON version number to the manuscript title and now note in the Acknowledgments that ICON is license bound.

Furthermore, if you did not use an official version but an intermediate version of the ICON model take care that this version is permanently archived (i.e. with a DOI, e.g. at zenodo. Zenodo does not automatically mean, that the archive is open to the world. I understand that this is not possible, as long as ICON is not open source).

ICON version 2.1.00 was used for these simulations and is available by contacting DWD.

Last but not least, please put the scripts for reproducing the figures also on a permanent archive (github unfortunately is not permanent).

We have generated a GitHub release that is now archived in a Zenodo repository:

<https://zenodo.org/account/settings/github/repository/sylviasullivan/nawdex-hackathon>

The URL in the acknowledgements has been corrected.

Yours,

Astrid Kerkweg
